# Supplementary material for: Simple Monotonic Readjustment Policies with Applications to Markdown Pricing and Pricing in the Presence of Strategic Customers
Source: Atypon-hosted journal article supplement (doi:10.1287/opre.2020.0774), 2023-12-29
Supplement: opre.2020.0774.sm1.pdf [file opre.2020.0774.sm1.pdf]

**This page is intentionally blank. Proper e-companion title page, with INFORMS branding and exact metadata of the main paper, will be produced by the INFORMS office when the issue is being assembled.**

## APPENDIX

### A: Proofs for Section 6

In this section, for notational convenience, we will use:

$$\theta \triangleq (x_0 + 1)^{-\frac{1}{3}}.$$

Since  $x_0 \geq 1$ , we have:  $\theta \in (0, 1)$ .

#### Proof of Lemma 1.

First, we have  $\eta_0 \geq 0 \geq \eta_1$ . So condition (2) holds.

Second, we have  $\eta_0 t_1 + \eta_1 (T - t_1) = 0$ . So condition (3) holds. ■

#### Proof of Lemma 2.

Conditional on  $\mathcal{G}$ , we have

$$\begin{aligned} \hat{\rho}_1 &= \max \left\{ \left( \rho^d - \eta_1 - \frac{\hat{\Delta}_0}{\lambda(T - t_1)} \right)^+, \hat{\rho}_0 \right\} \\ &= \max \left\{ \rho^d - \eta_1 - \frac{\hat{\Delta}_0}{\lambda(T - t_1)}, \hat{\rho}_0 \right\} \\ &= \max \left\{ \rho^d - \eta_1 - \frac{\hat{\Delta}_0}{\lambda(T - t_1)}, \rho^d - \eta_0 \right\} \\ &= \rho^d - \eta_1 - \frac{\hat{\Delta}_0}{\lambda(T - t_1)}. \end{aligned}$$

The first equality follows from the definition of  $\hat{\rho}_1$ . The second equality follows from the definition of  $\mathcal{G}_1$ . The third equality follows from the definition of  $\hat{\rho}_0$ . The fourth equality follows from the definition of  $\mathcal{G}_0$ . ■

#### Proof of Lemma 3.

We begin with proving Part 1 (i.e., the bound for  $A_1$ ).

First, we establish a lower bound of  $\mathbb{E}[\hat{\rho}_1 - \rho^d]$ . We have

$$\begin{aligned} \mathbb{E}[\hat{\rho}_1 - \rho^d] &= \mathbb{E}[(\hat{\rho}_1 - \rho^d) \mathbf{1}\{\mathcal{G}\}] + \mathbb{E}[(\hat{\rho}_1 - \rho^d) \mathbf{1}\{\mathcal{G}^c\}] \\ &= \mathbb{E} \left[ \left( -\eta_1 - \frac{\hat{\Delta}_0}{\lambda(T - t_1)} \right) \mathbf{1}\{\mathcal{G}\} \right] + \mathbb{E}[(\hat{\rho}_1 - \rho^d) \mathbf{1}\{\mathcal{G}^c\}] \\ &= \mathbb{E} \left[ \left( -\eta_1 - \frac{\hat{\Delta}_0}{\lambda(T - t_1)} \right) \mathbf{1}\{\mathcal{G}\} \right] + \mathbb{E} \left[ \left( -\eta_1 - \frac{\hat{\Delta}_0}{\lambda(T - t_1)} \right) \mathbf{1}\{\mathcal{G}^c\} \right] \end{aligned}$$

$$\begin{aligned}
& +\mathbb{E} \left[ \left( \hat{\rho}_1 - \rho^d + \eta_1 + \frac{\hat{\Delta}_0}{\lambda(T-t_1)} \right) \mathbf{1}\{\mathcal{G}^c\} \right] \\
& = \mathbb{E} \left[ -\eta_1 - \frac{\hat{\Delta}_0}{\lambda(T-t_1)} \right] + \mathbb{E} \left[ \left( \hat{\rho}_1 - \rho^d + \eta_1 + \frac{\hat{\Delta}_0}{\lambda(T-t_1)} \right) \mathbf{1}\{\mathcal{G}^c\} \right] \\
& = -\eta_1 + \mathbb{E} \left[ \left( \hat{\rho}_1 - \rho^d + \eta_1 + \frac{\hat{\Delta}_0}{\lambda(T-t_1)} \right) \mathbf{1}\{\mathcal{G}^c\} \right] \\
& \geq -\eta_1 - \mathbb{E} \left[ \left( \rho^d - \eta_1 - \frac{\hat{\Delta}_0}{\lambda(T-t_1)} \right) \mathbf{1}\{\mathcal{G}^c\} \right] \\
& \geq -\eta_1 - \mathbb{E} \left[ \left( \rho^d - \eta_1 + \frac{t_1 \hat{\rho}_0}{T-t_1} \right) \mathbf{1}\{\mathcal{G}^c\} \right] \\
& \geq -\eta_1 - \mathbb{E} \left[ \left( \rho^d - \eta_1 + \frac{t_1}{T-t_1} \right) \mathbf{1}\{\mathcal{G}^c\} \right] \\
& = -\eta_1 - \left( \rho^d - \eta_1 + \frac{t_1}{T-t_1} \right) \mathbb{P}(\mathcal{G}^c) \\
& = -\eta_1 - \left( \rho^d - \eta_1 + \frac{1}{\theta} - 1 \right) \mathbb{P}(\mathcal{G}^c),
\end{aligned}$$

where the fifth equality follows since  $\mathbb{E}[\hat{\Delta}_0] = 0$ , the first inequality follows since  $\hat{\rho}_1 \geq 0$ , the second inequality follows from the definition of  $\hat{\Delta}_0$  and the property that  $\hat{S}_0 \geq 0$ , the third inequality follows since  $\hat{\rho}_0 \leq 1$ , and the last equality follows from the definition of  $t_1$ .

Second, we establish a lower bound of  $\hat{\rho}_0 - \rho^d$ . We have

$$\hat{\rho}_0 - \rho^d = -\eta_0 \geq -\eta_0 - (\rho^d - \eta_0) \mathbb{P}(\mathcal{G}^c),$$

where the equality and the inequality follow from the assumption that  $\rho^d > \eta_0$ .

Therefore, we can bound:

$$\begin{aligned}
A_1 & \leq \lambda t_1 [\eta_0 + (\rho^d - \eta_0) \mathbb{P}(\mathcal{G}^c)] + \lambda(T-t_1) \left[ \eta_1 + \left( \rho^d - \eta_1 + \frac{1}{\theta} - 1 \right) \mathbb{P}(\mathcal{G}^c) \right] \\
& = \lambda \left[ t_1 \rho^d + (T-t_1) \left( \rho^d + \frac{1}{\theta} - 1 \right) \right] \mathbb{P}(\mathcal{G}^c) \\
& = \lambda \left[ T \rho^d + (T-t_1) \left( \frac{1}{\theta} - 1 \right) \right] \mathbb{P}(\mathcal{G}^c) \\
& = \lambda \left[ T \rho^d + T \theta \left( \frac{1}{\theta} - 1 \right) \right] \mathbb{P}(\mathcal{G}^c) \\
& \leq (\rho^d + 1) \lambda T \mathbb{P}(\mathcal{G}^c),
\end{aligned}$$

where the first equality follows from condition (3), the second equality follows from the definition of  $t_1$ , and the second inequality follows since  $\theta \in (0, 1)$ .

Next, we prove Part 2 (i.e., the bound for  $A_2$ ).

First, we establish an upper bound of  $\mathbb{E}[(\hat{\rho}_1 - \rho^d)^2]$ . We have:

$$\begin{aligned}
\mathbb{E}[(\hat{\rho}_1 - \rho^d)^2] &= \mathbb{E}[(\hat{\rho}_1 - \rho^d)^2 \mathbf{1}\{\mathcal{G}\}] + \mathbb{E}[(\hat{\rho}_1 - \rho^d)^2 \mathbf{1}\{\mathcal{G}^c\}] \\
&= \mathbb{E}\left[\left(-\eta_1 - \frac{\hat{\Delta}_0}{\lambda(T-t_1)}\right)^2 \mathbf{1}\{\mathcal{G}\}\right] + \mathbb{E}[(\hat{\rho}_1 - \rho^d)^2 \mathbf{1}\{\mathcal{G}^c\}] \\
&= \mathbb{E}\left[\left(\eta_1 + \frac{\hat{\Delta}_0}{\lambda(T-t_1)}\right)^2 \mathbf{1}\{\mathcal{G}\}\right] + \mathbb{E}\left[\left(\eta_1 + \frac{\hat{\Delta}_0}{\lambda(T-t_1)}\right)^2 \mathbf{1}\{\mathcal{G}^c\}\right] \\
&\quad + \mathbb{E}\left[\left\{(\hat{\rho}_1 - \rho^d)^2 - \left(\eta_1 + \frac{\hat{\Delta}_0}{\lambda(T-t_1)}\right)^2\right\} \mathbf{1}\{\mathcal{G}^c\}\right] \\
&= \underbrace{\mathbb{E}\left[\left(\eta_1 + \frac{\hat{\Delta}_0}{\lambda(T-t_1)}\right)^2\right]}_{B_1} + \underbrace{\mathbb{E}\left[\left\{(\hat{\rho}_1 - \rho^d)^2 - \left(\eta_1 + \frac{\hat{\Delta}_0}{\lambda(T-t_1)}\right)^2\right\} \mathbf{1}\{\mathcal{G}^c\}\right]}_{B_2}.
\end{aligned}$$

For  $B_1$ , we have

$$\begin{aligned}
B_1 &= \eta_1^2 + \mathbb{E}\left[\left(\frac{\hat{\Delta}_0}{\lambda(T-t_1)}\right)^2\right] + 2\eta_1 \mathbb{E}\left[\frac{\hat{\Delta}_0}{\lambda(T-t_1)}\right] \\
&= \eta_1^2 + \mathbb{E}\left[\left(\frac{\hat{\Delta}_0}{\lambda(T-t_1)}\right)^2\right] \\
&= \eta_1^2 + \mathbb{E}\left[\frac{t_1 \hat{\rho}_0}{\lambda(T-t_1)^2}\right] \\
&\leq \eta_1^2 + \frac{t_1}{\lambda(T-t_1)^2},
\end{aligned}$$

where the second equality follows since  $\mathbb{E}[\hat{\Delta}_0] = 0$ .

Next, we bound  $B_2$ . We discuss the following two cases:  $\hat{\rho}_1 \leq \rho^d$  and  $\hat{\rho}_1 > \rho^d$ .

Case 1:  $\hat{\rho}_1 \leq \rho^d$ .

We have

$$(\hat{\rho}_1 - \rho^d)^2 - \left(\eta_1 + \frac{\hat{\Delta}_0}{\lambda(T-t_1)}\right)^2 \leq (\hat{\rho}_1 - \rho^d)^2 \leq (\rho^d)^2.$$

Case 2:  $\hat{\rho}_1 > \rho^d$ .

We have:

$$\begin{aligned}\hat{\rho}_1 &= \max \left\{ (\rho^d - \eta_0)^+, \left( \rho^d - \eta_1 - \frac{\hat{\Delta}_0}{\lambda(T-t_1)} \right)^+ \right\} \\ &\leq \max \left\{ \rho^d - \eta_0, \rho^d - \eta_1 - \frac{\hat{\Delta}_0}{\lambda(T-t_1)} \right\},\end{aligned}$$

where the last equality follows since if  $a = \max\{b^+, c^+\}$ , where  $(\cdot)^+$  is a projection to  $[0, 1]$ , and  $a > 0$ , then at least one of  $b$  and  $c$  is strictly positive. Moreover,  $a \leq \max\{b, c\}$ .

Equivalently,

$$\hat{\rho}_1 - \rho^d \leq \max \left\{ -\eta_0, -\eta_1 - \frac{\hat{\Delta}_0}{\lambda(T-t_1)} \right\}.$$

Since  $\hat{\rho}_1 - \rho^d > 0$  and  $\eta_0 > 0$ , we must have

$$0 < \hat{\rho}_1 - \rho^d \leq -\eta_1 - \frac{\hat{\Delta}_0}{\lambda(T-t_1)},$$

which implies

$$(\hat{\rho}_1 - \rho^d)^2 - \left( \eta_1 + \frac{\hat{\Delta}_0}{\lambda(T-t_1)} \right)^2 \leq 0.$$

Therefore, the two cases above jointly imply

$$(\hat{\rho}_1 - \rho^d)^2 - \left( \eta_1 + \frac{\hat{\Delta}_0}{\lambda(T-t_1)} \right)^2 \leq (\rho^d)^2,$$

which gives

$$B_2 \leq (\rho^d)^2 \mathbf{E}[\mathbf{1}\{\mathcal{G}^c\}] = (\rho^d)^2 \mathbb{P}(\mathcal{G}^c).$$

Using the bounds for  $B_1$  and  $B_2$ , we can upper bound  $A_2$  with

$$\lambda(t_1\eta_0^2 + (T-t_1)\eta_1^2) + \lambda(T-t_1) \frac{t_1}{\lambda(T-t_1)^2} + \lambda T (\rho^d)^2 \mathbb{P}(\mathcal{G}^c). \quad (\text{EC.1})$$

Now, we bound the first and the second terms in (EC.1). For the first term in (EC.1), by the definition of  $\eta_0$ ,  $\eta_1$  and  $t_1$ , we have:

$$\lambda(t_1\eta_0^2 + (T-t_1)\eta_1^2) = \frac{(\ln(x_0+1))^{2\alpha}}{t_1} \left( t_1 + \frac{t_1^2}{T-t_1} \right)$$

$$\begin{aligned}
&= \frac{(\ln(x_0 + 1))^{2\alpha} T}{T - t_1} \\
&= \frac{(\ln(x_0 + 1))^{2\alpha}}{\theta}.
\end{aligned}$$

For the second term in (EC.1), we have:

$$\lambda(T - t_1) \frac{t_1}{\lambda(T - t_1)^2} = \frac{t_1}{T - t_1} = \frac{1 - \theta}{\theta} \leq \frac{1}{\theta}.$$

Combining the bounds for the first and the second terms in (EC.1) yields

$$\begin{aligned}
A_2 &\leq \frac{(\ln(x_0 + 1))^{2\alpha}}{\theta} + \frac{1}{\theta} + \lambda T (\rho^d)^2 \mathbb{P}(\mathcal{G}^c) \\
&= \frac{(\ln(x_0 + 1))^{2\alpha} + 1}{\theta} + \lambda T (\rho^d)^2 \mathbb{P}(\mathcal{G}^c).
\end{aligned}$$

■

#### Proof of Lemma 4.

Conditional on  $\mathcal{G}$ , we have:

$$\hat{\rho}_1 = \rho^d - \eta_1 - \frac{\hat{\Delta}_0}{\lambda(T - t_1)}, \quad \text{and } \hat{\rho}_1 \in (0, 1).$$

Therefore, we can write

$$\begin{aligned}
x_0 - \hat{S}_0 &= \lambda T \rho^d - \left( \lambda t_1 \hat{\rho}_0 + \hat{\Delta}_0 \right) \\
&= \lambda T \rho^d - \left[ \lambda t_1 (\rho^d - \eta_0) + \hat{\Delta}_0 \right] \\
&= \lambda T \rho^d - \lambda t_1 \rho^d + \lambda t_1 \eta_0 - \hat{\Delta}_0 \\
&= \lambda T \rho^d - \lambda t_1 \rho^d - \lambda (T - t_1) \eta_1 - \hat{\Delta}_0 \\
&= \lambda (T - t_1) \rho^d - \lambda (T - t_1) \eta_1 - (T - t_1) \frac{\hat{\Delta}_0}{T - t_1} \\
&= \lambda (T - t_1) \left( \rho^d - \eta_1 - \frac{\hat{\Delta}_0}{\lambda (T - t_1)} \right) \\
&= \lambda (T - t_1) \hat{\rho}_1 \\
&= \lambda T (x_0 + 1)^{-1/3} \hat{\rho}_1 \\
&> 0,
\end{aligned}$$

where the fourth equality follows since  $\sum_{n=0}^1 (t_{n+1} - t_n) \eta_n = 0$ . ■

### Proof of Lemma 5.

We have:

$$\mathbb{E} \left[ \left( \sum_{n=0}^1 \hat{S}_n - x_0 \right)^+ \right] = \underbrace{\mathbb{E} \left[ \left( \sum_{n=0}^1 \hat{S}_n - x_0 \right)^+ \mathbf{1} \{ \mathcal{G} \} \right]}_{C_1} + \underbrace{\mathbb{E} \left[ \left( \sum_{n=0}^1 \hat{S}_n - x_0 \right)^+ \mathbf{1} \{ \mathcal{G}^c \} \right]}_{C_2}.$$

First, we establish an upper bound for  $C_1$ . Note that

$$\begin{aligned} C_1 &= \mathbb{E} \left[ \left( \sum_{n=0}^1 \hat{S}_n - x_0 \right)^+ \middle| \mathcal{G} \right] \mathbb{P}(\mathcal{G}) \\ &= \mathbb{E} \left[ \left( \hat{S}_1 - X_{t_1-} \right)^+ \middle| \mathcal{G} \right] \mathbb{P}(\mathcal{G}) \\ &= \mathbb{E} \left[ \left( \hat{S}_1 - \lambda(T - t_1) \hat{\rho}_1 \right)^+ \middle| \mathcal{G} \right] \mathbb{P}(\mathcal{G}) \\ &= \mathbb{E} \left[ \left( \hat{S}_1 - \lambda(T - t_1) \hat{\rho}_1 \right)^+ \right] \\ &\leq \frac{1}{2} \lambda^{1/2} (T - t_1)^{1/2} \\ &= \frac{1}{2} (\lambda T)^{1/2} (x_0 + 1)^{-1/6}, \end{aligned}$$

where the third equality follows from Lemma 4 and the inequality follows since  $\hat{\rho}_1 \in [0, 1]$  combined with the fact that if a random variable  $X$  has mean  $\mu$  and standard deviation  $\sigma$ , then  $\mathbb{E}[(X - \mu)^+] \leq \frac{\sigma}{2}$  (see equation (18) in Gallego and Van Ryzin (1994)).

Next, we establish an upper bound for  $C_2$ . Let  $\tilde{Z}$  denote the total number of customers arriving to the system over  $[0, T]$ . Then,  $\tilde{Z}$  is a Poisson random variable with parameter  $\lambda T$ . We have:

$$\begin{aligned} C_2 &\leq \mathbb{E} \left[ \left( \tilde{Z} - x_0 \right)^+ \mathbf{1} \{ \mathcal{G}^c \} \right] \\ &\leq \mathbb{E} \left[ \tilde{Z} \mathbf{1} \{ \mathcal{G}^c \} \right] \\ &\leq \mathbb{E}[\tilde{Z}^2]^{\frac{1}{2}} \mathbb{E}[\mathbf{1} \{ \mathcal{G}^c \}]^{\frac{1}{2}} \\ &= (\lambda^2 T^2 + \lambda T)^{\frac{1}{2}} \mathbb{P}(\mathcal{G}^c)^{\frac{1}{2}} \\ &\leq (\lambda T + 1) \mathbb{P}(\mathcal{G}^c)^{\frac{1}{2}}, \end{aligned}$$

where the first inequality follows since  $\sum_{n=0}^1 \hat{S}_n \leq \tilde{Z}$  and the third inequality follows from Cauchy-Schwarz inequality.

Putting the bounds for  $C_1$  and  $C_2$  together completes the proof of Lemma EC.3. ■

### Proof of Lemma 6.

In proving Lemma 6, we will use some results proved in Appendix C.

First, we establish an upper bound for  $\mathbb{P}(\mathcal{G}_0^c)$ . We have

$$\begin{aligned}
\mathbb{P}(\mathcal{G}_0^c) &= \mathbb{P}\left(\frac{\hat{\Delta}_0}{\lambda(T-t_1)} \geq \eta_0 - \eta_1\right) \\
&\leq \exp\left(-0.1\lambda(T-t_1)(\eta_0 - \eta_1) \min\left\{\frac{\lambda(T-t_1)(\eta_0 - \eta_1)}{\lambda(t_1-t_0)\hat{\rho}_0}, 1\right\}\right) \\
&\leq \exp\left(-0.1\lambda(T-t_1)(\eta_0 - \eta_1) \min\left\{\frac{T-t_1}{t_1}(\eta_0 - \eta_1), 1\right\}\right) \\
&= \exp\left(-0.1\lambda T\theta(\eta_0 - \eta_1) \min\left\{\frac{\theta}{1-\theta}(\eta_0 - \eta_1), 1\right\}\right) \\
&= \exp\left(-0.1(\lambda T)^{\frac{1}{2}}(\ln(x_0+1))^\alpha \frac{1}{(1-\theta)^{1/2}} \min\left\{\frac{(\ln(x_0+1))^\alpha}{(\lambda T)^{1/2}} \frac{1}{(1-\theta)^{3/2}}, 1\right\}\right) \\
&\leq \exp\left(-0.1(\lambda T)^{\frac{1}{2}}(\ln(x_0+1))^\alpha \min\left\{\frac{(\ln(x_0+1))^\alpha}{(\lambda T)^{1/2}}, 1\right\}\right) \\
&= \exp\left(-0.1(\ln(x_0+1))^{2\alpha} \min\left\{1, \frac{(\lambda T)^{1/2}}{(\ln(x_0+1))^\alpha}\right\}\right),
\end{aligned}$$

where the first inequality follows from Lemma EC.5, the second inequality follows since  $\hat{\rho}_0 \leq 1$ , the

third equality follows from the property that

$$\eta_0 - \eta_1 = \frac{(\ln(x_0+1))^\alpha}{\lambda^{1/2}} \frac{1}{T^{1/2}\theta(1-\theta)^{1/2}},$$

and the third inequality follows since  $\theta \in (0, 1)$ .

Second, we establish an upper bound for  $\mathbb{P}(\mathcal{G}_1^c)$ . We can write  $\mathcal{G}_1^c = E_1 \cup E_2$  where

$$\begin{aligned}
E_1 &\triangleq \left\{ \rho^d - \eta_1 - \frac{\hat{\Delta}_0}{\lambda(T-t_1)} \leq 0 \right\}, \\
E_2 &\triangleq \left\{ \rho^d - \eta_1 - \frac{\hat{\Delta}_0}{\lambda(T-t_1)} \geq 1 \right\}.
\end{aligned}$$

The two events  $E_1$  and  $E_2$  are independent. So,  $\mathbb{P}(\mathcal{G}_1^c) = \mathbb{P}(E_1) + \mathbb{P}(E_2)$ . We start with deriving an

upper bound for  $\mathbb{P}(E_1)$ .

Consider  $\mu \in (0, \lambda)$  and suppose that  $\eta_1 < \rho^d$  and  $\theta < \frac{2}{\rho^d - \eta_1}$ <sup>5</sup>. We have:

$$\begin{aligned}
\mathbb{P}(E_1) &= \mathbb{P}\left(\frac{\hat{\Delta}_0}{\lambda(T-t_1)} \geq \rho^d - \eta_1\right) \\
&= \mathbb{P}\left(\frac{\hat{\Delta}_0}{\lambda} \geq (T-t_1)(\rho^d - \eta_1)\right) \\
&= \mathbb{P}\left(\exp\left(\frac{\mu}{\lambda}\hat{\Delta}_0\right) \geq \exp\left(\mu(T-t_1)(\rho^d - \eta_1)\right)\right) \\
&\leq \mathbb{E}\left[\exp\left(\frac{\mu}{\lambda}\hat{\Delta}_0 - \mu(T-t_1)(\rho^d - \eta_1)\right)\right] \\
&\leq \exp\left(\frac{\mu^2}{\lambda}t_1 - \mu(T-t_1)(\rho^d - \eta_1)\right) \\
&= \exp\left(\frac{\mu^2 T}{\lambda}(1-\theta) - \mu T\theta(\rho^d - \eta_1)\right) \\
&\leq \exp\left(\mu^2 \frac{T}{\lambda} - \mu T\theta(\rho^d - \eta_1)\right).
\end{aligned}$$

The first inequality follows from Markov inequality. The second inequality holds due to the following reasons: First, if  $X$  is a Poisson random variable with parameter  $\lambda$ , then the moment generating function is given by  $\mathbb{E}[e^{\tilde{\mu}X}] = \exp(\lambda(e^{\tilde{\mu}} - 1))$ ; second, we have the property that  $e^{\tilde{\mu}} \leq 1 + \tilde{\mu} + \tilde{\mu}^2$  for  $\tilde{\mu} \in [0, 1]$ ; third, these two results jointly imply  $\mathbb{E}[e^{\tilde{\mu}(X-\lambda)}] \leq e^{\lambda\tilde{\mu}^2}$  for  $\tilde{\mu} \in [0, 1]$ ; and, fourth, the condition  $\mu \in (0, \lambda)$  guarantees that  $\frac{\mu}{\lambda} \in (0, 1)$ .

The last bound for  $\mathbb{P}(E_1)$  is minimized at

$$\mu = \frac{\theta\lambda(\rho^d - \eta_1)}{2},$$

which is in  $(0, \lambda)$  since  $\theta < \frac{2}{\rho^d - \eta_1}$ , and yields the following bound:

$$\mathbb{P}(E_1) \leq \exp\left(-\frac{\lambda T\theta^2(\rho^d - \eta_1)^2}{4}\right).$$

Now, we derive an upper bound for  $\mathbb{P}(E_2)$ . We can use a similar argument as above. Consider again  $\mu \in (0, \lambda)$  and suppose that  $\eta_1 < \rho^d$  and  $\theta < \frac{2}{1 - \rho^d + \eta_1}$ . Then,

$$\begin{aligned}
\mathbb{P}(E_2) &= \mathbb{P}\left(\frac{-\hat{\Delta}_0}{\lambda(T-t_1)} \geq 1 - (\rho^d - \eta_1)\right) \\
&\leq \mathbb{E}\left[\exp\left(-\frac{\mu}{\lambda}\hat{\Delta}_0 - \mu(T-t_1)(1 - \rho^d + \eta_1)\right)\right]
\end{aligned}$$

<sup>5</sup>This condition is satisfied in the asymptotic regime that we will analyze in the later part of this proof. As we will show momentarily,  $\lim_{k \rightarrow \infty} \theta^{(k)} = 0$  and  $\lim_{k \rightarrow \infty} \eta_1^{(k)} = 0$ . Therefore, this condition is guaranteed to hold for sufficiently large  $k$ .

$$\begin{aligned} &\leq \exp\left(\frac{\mu^2}{\lambda}t_1 - \mu(T - t_1)(1 - \rho^d + \eta_1)\right) \\ &\leq \exp\left(\mu^2\frac{T}{\lambda} - \mu T\theta(1 - \rho^d + \eta_1)\right). \end{aligned}$$

The second inequality holds due to the following reasons: First, if  $X$  is a Poisson random variable with parameter  $\lambda$ , then  $\mathbf{E}[e^{-\tilde{\mu}X}] = \exp(\lambda(e^{-\tilde{\mu}} - 1))$ ; second,  $e^{-\tilde{\mu}} \leq 1 - \tilde{\mu} + \tilde{\mu}^2$  for  $\tilde{\mu} \in [0, 1]$ ; third, the first and the second points jointly imply  $\mathbf{E}[e^{-\tilde{\mu}(X-\lambda)}] \leq e^{\lambda\tilde{\mu}^2}$  for  $\tilde{\mu} \in [0, 1]$ ; and, fourth, the condition  $\mu \in (0, \lambda)$  guarantees that  $\frac{\mu}{\lambda} \in (0, 1)$ .

The last bound for  $\mathbb{P}(E_2)$  is minimized at

$$\mu = \frac{\theta\lambda(1 - \rho^d + \eta_1)}{2},$$

which is in  $(0, \lambda)$  since  $\theta < \frac{2}{1 - \rho^d + \eta_1}$ , and yields the following bound:

$$\mathbb{P}(E_2) \leq \exp\left(-\frac{\lambda T\theta^2(1 - \rho^d + \eta_1)^2}{4}\right).$$

We conclude that as long as  $\theta < \min\left\{\frac{2}{\rho^d - \eta_1}, \frac{2}{1 - \rho^d + \eta_1}\right\}$ , we have:

$$\begin{aligned} \mathbb{P}(\mathcal{G}^c) &\leq \sum_{n=0}^1 \mathbb{P}(\mathcal{G}_n^c) \\ &\leq \exp\left(-0.1(\ln(x_0 + 1))^{2\alpha} \min\left\{1, \frac{(\lambda T)^{1/2}}{(\ln(x_0 + 1))^\alpha}\right\}\right) \\ &\quad + \exp\left(-\frac{\lambda T\theta^2(\rho^d - \eta_1)^2}{4}\right) + \exp\left(-\frac{\lambda T\theta^2(1 - \rho^d + \eta_1)^2}{4}\right). \end{aligned}$$

Now, we claim that

$$\lim_{k \rightarrow \infty} \theta^{(k)} = 0, \quad \lim_{k \rightarrow \infty} \frac{(\lambda T^{(k)})^{1/2} \theta^{(k)}}{(\ln(x_0^{(k)} + 1))^\alpha} = \infty, \quad \lim_{k \rightarrow \infty} \eta_1^{(k)} = 0.$$

The first one is immediate by the definition of  $\theta$ . The second one is also immediate since the numerator is on the order of  $k^{1/6}$  whereas the denominator is only poly-logarithmic in  $k$ . (Both the first and the second limits also imply  $\lim_{k \rightarrow \infty} \frac{(\lambda T^{(k)})^{1/2}}{(\ln(x_0^{(k)} + 1))^\alpha} = \infty$ .) As for the third one, note that

$$\begin{aligned} \eta_1 &= -\frac{(\ln(x_0 + 1))^\alpha}{\lambda^{1/2}} \frac{t_1^{1/2}}{T - t_1} \\ &= -\frac{(\ln(x_0 + 1))^\alpha (1 - \theta)^{1/2}}{\lambda^{1/2} T^{1/2} \theta} \end{aligned}$$

$$\begin{aligned}
&= -\frac{(\ln(x_0 + 1))^\alpha (1 - \theta)^{1/2}}{(\lambda T)^{1/2} \theta} \\
&\geq -\frac{(\ln(x_0 + 1))^\alpha}{(\lambda T)^{1/2} \theta} \\
&= -\frac{(\ln(x_0 + 1))^\alpha (x_0 + 1)^{1/3}}{(\lambda T)^{1/2}}.
\end{aligned}$$

The term after the last equality goes to 0 as  $k \rightarrow \infty$ . So,  $\eta_1^{(k)} \geq 0$  as  $k \rightarrow \infty$ . But since  $\eta_1^{(k)} \leq 0$  by definition, we must have  $\eta_1^{(k)} \rightarrow 0$  as  $k \rightarrow \infty$ .

Let  $\hat{\beta} \triangleq \min\{\rho^d, 1 - \rho^d\}/2$ . (Note that  $\hat{\beta} \in (0, 1)$ .) Based on our limit results above, we conclude there exists a constant  $K > 0$  such that, for all  $k > K$ , we have:

$$\begin{aligned}
\lambda T^{(k)} &\geq (\ln(x_0^{(k)} + 1))^{2\alpha}, \\
\lambda T^{(k)} (\theta^{(k)})^2 &\geq \frac{0.4}{\hat{\beta}^2} \cdot (\ln(x_0^{(k)} + 1))^{2\alpha}, \\
\rho^d - \eta_1^{(k)} &\geq \hat{\beta}, \\
1 - \rho^d + \eta_1^{(k)} &\geq \hat{\beta}
\end{aligned}$$

We conclude that, for all  $k > K$ , we can bound:

$$\mathbb{P}(\mathcal{G}^c) \leq \sum_{n=0}^1 \mathbb{P}(\mathcal{G}_n^c) \leq 3 \exp\left(-0.1 \left(\ln(x_0^{(k)} + 1)\right)^{2\alpha}\right). \quad \blacksquare$$

## B: Proofs for Section 7

In this section, we will use:

$$\theta \triangleq (x_0 + 1)^{-\frac{1}{N+2}}.$$

We have:  $\theta \in (0, 1)$ .

### Proof of Lemma 7.

First, we prove that condition (2) is satisfied.

For any  $n = 0, \dots, N - 2$ , by definition, we have:

$$\begin{aligned}
\eta_n - \eta_{n+1} &= \frac{(\ln(x_0 + 1))^\alpha}{(\lambda T)^{1/2}} \left[ \frac{T^{1/2}}{(t_{n+1} - t_n)^{1/2}} - \frac{T^{1/2}}{(t_{n+2} - t_{n+1})^{1/2}} + \frac{T^{1/2} (t_{n+1} - t_n)^{1/2}}{T - t_{n+1}} \right] \\
&= \frac{(\ln(x_0 + 1))^\alpha}{(\lambda T)^{1/2}} \left[ \frac{1}{\theta^{n/2} (1 - \theta)^{1/2}} - \frac{1}{\theta^{(n+1)/2} (1 - \theta)^{1/2}} + \frac{(1 - \theta)^{1/2}}{\theta^{(n+2)/2}} \right]
\end{aligned}$$

$$\begin{aligned}
&= \frac{(\ln(x_0 + 1))^\alpha}{(\lambda T)^{1/2}} \frac{1 - \theta^{1/2}}{\theta^{(n+2)/2} (1 - \theta)^{1/2}} \\
&> 0.
\end{aligned}$$

For  $n = N - 1$ , we have:

$$\begin{aligned}
\eta_{N-1} - \eta_N &= \frac{(\ln(x_0 + 1))^\alpha}{(\lambda T)^{1/2}} \left[ \frac{T^{1/2}}{(t_N - t_{N-1})^{1/2}} + \frac{T^{1/2} (t_N - t_{N-1})^{1/2}}{T - t_N} \right] \\
&= \frac{(\ln(x_0 + 1))^\alpha}{\lambda^{1/2}} \frac{1}{\theta^{(N+1)/2} (1 - \theta)^{1/2}} \\
&> 0.
\end{aligned}$$

Second, we prove that condition (3) is satisfied. Note that

$$\begin{aligned}
\sum_{n=0}^N (t_{n+1} - t_n) \eta_n &= \frac{(\ln(x_0 + 1))^\alpha}{\lambda^{1/2}} \sum_{n=0}^{N-1} (t_{n+1} - t_n)^{\frac{1}{2}} - \frac{(\ln(x_0 + 1))^\alpha}{\lambda^{1/2}} \sum_{n=0}^N \sum_{m=0}^{n-1} (t_{n+1} - t_n) \frac{(t_{m+1} - t_m)^{1/2}}{T - t_{m+1}} \\
&= \frac{(\ln(x_0 + 1))^\alpha}{\lambda^{1/2}} \sum_{n=0}^{N-1} (t_{n+1} - t_n)^{\frac{1}{2}} - \frac{(\ln(x_0 + 1))^\alpha}{\lambda^{1/2}} \sum_{m=0}^{N-1} \left[ \sum_{n=m+1}^N (t_{n+1} - t_n) \right] \frac{(t_{m+1} - t_m)^{1/2}}{T - t_{m+1}} \\
&= \frac{(\ln(x_0 + 1))^\alpha}{\lambda^{1/2}} \sum_{n=0}^{N-1} (t_{n+1} - t_n)^{\frac{1}{2}} - \frac{(\ln(x_0 + 1))^\alpha}{\lambda^{1/2}} \sum_{m=0}^{N-1} (t_{m+1} - t_m)^{1/2} \\
&= 0.
\end{aligned}$$

This completes the proof of Lemma 7.  $\blacksquare$

## B.1: Outline of the Proof of Theorem 4

In this subsection, we provide an outline of the proof of Theorem 4. The remaining details of the proof can be found in Appendix B.2.

We proceed in a similar way as in the outline of the proof of Theorem 3 in Section 6. Without loss of generality, we assume that  $\rho^d > \eta_0$  and  $\lambda T > 1$ . We also define  $\hat{\rho}_n$  as follows:

$$\hat{\rho}_n \triangleq \begin{cases} (\rho^d - \eta_0)^+ & \text{if } n = 0, \\ \max \left\{ \left( \rho^d - \eta_n - \sum_{m=0}^{n-1} \frac{\hat{\Delta}_m}{\lambda(T - t_{m+1})} \right)^+, \hat{\rho}_{n-1} \right\} & \text{if } n = 1, \dots, N \end{cases}$$

where  $\hat{S}_n$  is a Poisson random variable with mean  $\lambda(t_{n+1} - t_n)\hat{\rho}_n$  and  $\hat{\Delta}_m \triangleq \hat{S}_m - \lambda(t_{m+1} - t_m)\hat{\rho}_m$ .

We begin by noting the following lower bound:

$$J^{\pi^{\text{Re}}} (x_0, T) \geq \sum_{n=0}^N \mathbb{E} \left[ \bar{F}^{-1}(\hat{\rho}_n) \hat{S}_n \right] - \text{VE} \left[ \left( \sum_{n=0}^N \hat{S}_n - x_0 \right)^+ \right]. \quad (\text{EC.2})$$

The first term on the R.H.S. can be bounded as follows:

$$\begin{aligned} \sum_{n=0}^N \mathbb{E} \left[ \bar{F}^{-1}(\hat{\rho}_n) \hat{S}_n \right] &= \sum_{n=0}^N \mathbb{E} \left[ \bar{F}^{-1}(\hat{\rho}_n) \mathbb{E} \left[ \hat{S}_n \middle| \mathcal{F}_{t_n} \right] \right] \\ &= \sum_{n=0}^N \mathbb{E} \left[ \bar{F}^{-1}(\hat{\rho}_n) \lambda(t_{n+1} - t_n) \hat{\rho}_n \right] \\ &= \sum_{n=0}^N \lambda(t_{n+1} - t_n) \mathbb{E} [R(\hat{\rho}_n)] \\ &\geq \underbrace{\bar{J}(x_0, T) - R'(\rho^d) (-\lambda) \sum_{n=0}^N (t_{n+1} - t_n) \mathbb{E} [(\hat{\rho}_n - \rho^d)]}_{A_1} \\ &\quad - \underbrace{\frac{C}{2} \lambda \sum_{n=0}^N (t_{n+1} - t_n) \mathbb{E} [(\hat{\rho}_n - \rho^d)^2]}_{A_2}. \end{aligned}$$

As our analysis in Section 6, we define the “good event”  $\mathcal{G} \triangleq \bigcap_{n=1}^N (\mathcal{G}_{n0} \cap \mathcal{G}_{n1})$ , where

$$\begin{aligned} \mathcal{G}_{n0} &\triangleq \left\{ \eta_{m-1} - \eta_n > \frac{\hat{\Delta}_{n-1}}{\lambda(T - t_n)} \right\}, \\ \mathcal{G}_{n1} &\triangleq \left\{ \rho^d - \eta_n - \sum_{m=0}^{n-1} \frac{\hat{\Delta}_m}{\lambda(T - t_{m+1})} \in (0, 1) \right\}. \end{aligned}$$

It is not difficult to see that, conditional on  $\mathcal{G}$ , we have

$$\hat{\rho}_n = \rho^d - \eta_n - \sum_{m=0}^{n-1} \frac{\hat{\Delta}_m}{\lambda(T - t_{m+1})} > 0 \quad (\text{EC.3})$$

for all  $n = 0, \dots, N$ . The proof is very similar to the proof of Lemma 2; we omit the details.

The following lemma gives us a bound for each  $A_1$  and  $A_2$ .

LEMMA EC.1. *In the setting of Theorem 4, we can bound:*

$$\begin{aligned} A_1 &\leq (\rho^d + 1) \lambda T \mathbb{P}(\mathcal{G}^c), \\ A_2 &\leq 5 (\ln(x_0 + 1))^{2\alpha} \frac{N+1}{\theta} + \frac{N}{\theta} \end{aligned}$$

$$+ \lambda T \left( \max \left\{ \rho^d, N (\ln(x_0 + 1))^\alpha \frac{(x_0 + 1)^{1/2}}{(\lambda T)^{1/2}} + N (x_0 + 1)^{\frac{1}{N+2}} \right\} \right)^2 \mathbb{P}(\mathcal{G}^c).$$

Event  $\mathcal{G}$  also enjoys the following inventory balancing property.

LEMMA EC.2. (*Inventory balancing*) *Conditional on  $\mathcal{G}$ , we have:*

$$X_{t_N-} = x_0 - \sum_{n=0}^{N-1} \hat{S}_n = \lambda T (x_0 + 1)^{\frac{-N}{N+2}} \hat{\rho}_N > 0.$$

The above lemma tells us that, conditional on event  $\mathcal{G}$ , the seller never runs out of inventory before his last price update time  $t_N$ . So, our policy depletes inventory at an appropriate rate that guarantees inventory is available for most of the time throughout the horizon.

Our next lemma gives us a bound for the second term on the R.H.S. of (EC.2).

LEMMA EC.3. *In the setting of Theorem 4, we have:*

$$\mathbb{E} \left[ \left( \sum_{n=0}^N \hat{S}_n - x_0 \right)^+ \right] \leq \frac{1}{2} (\lambda T)^{\frac{1}{2}} (x_0 + 1)^{-\frac{N}{2(N+2)}} + (\lambda T + 1) \mathbb{P}(\mathcal{G}^c)^{\frac{1}{2}}.$$

Finally, our last lemma provides a bound for the probability of bad event  $\mathcal{G}^c$ .

LEMMA EC.4. *Consider the asymptotic setting in Theorem 4 and assume that  $N$  satisfies the condition stated in the theorem. There exists a constant  $K > 0$  such that, for all  $k > K$ , we have:*

$$\mathbb{P}(\mathcal{G}^c) \leq 3N \exp \left( -0.05 \left( \ln(x_0^{(k)} + 1) \right)^{2\alpha} \right).$$

Putting the bounds in Lemmas EC.1 to EC.4 immediately yields the bound in Theorem 4.

## B.2: Proofs of Intermediate Results in Appendix B.1

### Proof of Lemma EC.1.

We begin with proving Part 1 (i.e., the bound for  $A_1$ ).

First, we establish a lower bound of  $\mathbb{E}[\hat{\rho}_n - \rho^d]$ . We have:

$$\mathbb{E}[\hat{\rho}_n - \rho^d] = \mathbb{E}[(\hat{\rho}_n - \rho^d) \mathbf{1}\{\mathcal{G}\}] + \mathbb{E}[(\hat{\rho}_n - \rho^d) \mathbf{1}\{\mathcal{G}^c\}]$$

$$\begin{aligned}
&= \mathbf{E} \left[ \left( -\eta_n - \sum_{m=0}^{n-1} \frac{\hat{\Delta}_m}{\lambda(T-t_{m+1})} \right) \mathbf{1}\{\mathcal{G}\} \right] + \mathbf{E} [(\hat{\rho}_n - \rho^d) \mathbf{1}\{\mathcal{G}^c\}] \\
&= \mathbf{E} \left[ \left( -\eta_n - \sum_{m=0}^{n-1} \frac{\hat{\Delta}_m}{\lambda(T-t_{m+1})} \right) \mathbf{1}\{\mathcal{G}\} \right] + \mathbf{E} \left[ \left( -\eta_n - \sum_{m=0}^{n-1} \frac{\hat{\Delta}_m}{\lambda(T-t_{m+1})} \right) \mathbf{1}\{\mathcal{G}^c\} \right] \\
&\quad + \mathbf{E} \left[ \left( \hat{\rho}_n - \rho^d + \eta_n + \sum_{m=0}^{n-1} \frac{\hat{\Delta}_m}{\lambda(T-t_{m+1})} \right) \mathbf{1}\{\mathcal{G}^c\} \right] \\
&= \mathbf{E} \left[ -\eta_n - \sum_{m=0}^{n-1} \frac{\hat{\Delta}_m}{\lambda(T-t_{m+1})} \right] + \mathbf{E} \left[ \left( \hat{\rho}_n - \rho^d + \eta_n + \sum_{m=0}^{n-1} \frac{\hat{\Delta}_m}{\lambda(T-t_{m+1})} \right) \mathbf{1}\{\mathcal{G}^c\} \right] \\
&= -\eta_n + \mathbf{E} \left[ \left( \hat{\rho}_n - \rho^d + \eta_n + \sum_{m=0}^{n-1} \frac{\hat{\Delta}_m}{\lambda(T-t_{m+1})} \right) \mathbf{1}\{\mathcal{G}^c\} \right] \\
&\geq -\eta_n - \mathbf{E} \left[ \left( \rho^d - \eta_n - \sum_{m=0}^{n-1} \frac{\hat{\Delta}_m}{\lambda(T-t_{m+1})} \right) \mathbf{1}\{\mathcal{G}^c\} \right] \\
&\geq -\eta_n - \mathbf{E} \left[ \left( \rho^d - \eta_n + \sum_{m=0}^{n-1} \frac{(t_{m+1} - t_m) \hat{\rho}_m}{T - t_{m+1}} \right) \mathbf{1}\{\mathcal{G}^c\} \right] \\
&\geq -\eta_n - \mathbf{E} \left[ \left( \rho^d - \eta_n + \sum_{m=0}^{n-1} \frac{t_{m+1} - t_m}{T - t_{m+1}} \right) \mathbf{1}\{\mathcal{G}^c\} \right] \\
&= -\eta_n - \left( \rho^d - \eta_n + \sum_{m=0}^{n-1} \frac{t_{m+1} - t_m}{T - t_{m+1}} \right) \mathbb{P}(\mathcal{G}^c) \\
&= -\eta_n - \left( \rho^d - \eta_n + n \left( \frac{1}{\theta} - 1 \right) \right) \mathbb{P}(\mathcal{G}^c),
\end{aligned}$$

where the first inequality follows from the property that  $\hat{\rho}_n \geq 0$ , the second inequality follows from the definition of  $\hat{\Delta}_m$  and the property that  $\hat{S}_m \geq 0$ , the third inequality follows from the property that  $\hat{\rho}_m \leq 1$ , and the last equality follows from the definition of  $t_n$ . Therefore, we can bound:

$$\begin{aligned}
-\lambda \sum_{n=0}^N (t_{n+1} - t_n) \mathbf{E} [(\hat{\rho}_n - \rho^d)] &\leq \lambda \sum_{n=0}^N (t_{n+1} - t_n) \eta_n + \lambda \sum_{n=0}^N (t_{n+1} - t_n) \left( \rho^d - \eta_n + n \left( \frac{1}{\theta} - 1 \right) \right) \mathbb{P}(\mathcal{G}^c) \\
&= \lambda \sum_{n=0}^N (t_{n+1} - t_n) \eta_n \mathbb{P}(\mathcal{G}) + \lambda \sum_{n=0}^N (t_{n+1} - t_n) \left( \rho^d + n \left( \frac{1}{\theta} - 1 \right) \right) \mathbb{P}(\mathcal{G}^c) \\
&= \lambda \sum_{n=0}^N (t_{n+1} - t_n) \left( \rho^d + n \left( \frac{1}{\theta} - 1 \right) \right) \mathbb{P}(\mathcal{G}^c) \\
&= \lambda \left[ \rho^d T + \sum_{n=0}^N (t_{n+1} - t_n) n \left( \frac{1}{\theta} - 1 \right) \right] \mathbb{P}(\mathcal{G}^c) \\
&= \lambda \left[ \rho^d T + \sum_{n=0}^{N-1} T (\theta^n - \theta^{n+1}) n \left( \frac{1}{\theta} - 1 \right) + TN\theta^N \left( \frac{1}{\theta} - 1 \right) \right] \mathbb{P}(\mathcal{G}^c) \\
&= \lambda \left[ \rho^d T + T \left( \frac{1}{\theta} - 1 \right) \sum_{n=1}^N \theta^n \right] \mathbb{P}(\mathcal{G}^c)
\end{aligned}$$

$$\begin{aligned} &\leq \lambda \left[ \rho^d T + T \left( \frac{1}{\theta} - 1 \right) \sum_{n=1}^{\infty} \theta^n \right] \mathbb{P}(\mathcal{G}^c) \\ &= (\rho^d + 1) \lambda T \mathbb{P}(\mathcal{G}^c), \end{aligned}$$

where the second equality holds since  $\sum_{n=0}^N (t_{n+1} - t_n) \eta_n = 0$ , the fourth equality follows from the definition of  $t_n = T(1 - \theta^n)$ , the second inequality follows since  $\theta \in (0, 1)$ ; and, the last equality follows from the property that  $\sum_{n=1}^{\infty} \theta^n = \frac{1}{1-\theta} - 1 = \frac{\theta}{1-\theta}$ .

Next, we prove Part 2 (i.e., the bound for  $A_2$ ).

First, we establish an upper bound of  $\mathbb{E}[(\hat{\rho}_n - \rho^d)^2]$ . We have:

$$\begin{aligned} \mathbb{E}[(\hat{\rho}_n - \rho^d)^2] &= \mathbb{E}[(\hat{\rho}_n - \rho^d)^2 \mathbf{1}\{\mathcal{G}\}] + \mathbb{E}[(\hat{\rho}_n - \rho^d)^2 \mathbf{1}\{\mathcal{G}^c\}] \\ &= \mathbb{E}\left[\left(-\eta_n - \sum_{m=0}^{n-1} \frac{\hat{\Delta}_m}{\lambda(T - t_{m+1})}\right)^2 \mathbf{1}\{\mathcal{G}\}\right] + \mathbb{E}[(\hat{\rho}_n - \rho^d)^2 \mathbf{1}\{\mathcal{G}^c\}] \\ &= \underbrace{\mathbb{E}\left[\left(\eta_n + \sum_{m=0}^{n-1} \frac{\hat{\Delta}_m}{\lambda(T - t_{m+1})}\right)^2\right]}_{B_1} + \underbrace{\mathbb{E}\left[\left\{(\hat{\rho}_n - \rho^d)^2 - \left(\eta_n + \sum_{m=0}^{n-1} \frac{\hat{\Delta}_m}{\lambda(T - t_{m+1})}\right)^2\right\} \mathbf{1}\{\mathcal{G}^c\}\right]}_{B_2}. \end{aligned}$$

For  $B_1$ , we have

$$\begin{aligned} B_1 &= \eta_n^2 + \sum_{m=0}^{n-1} \mathbb{E}\left[\left(\frac{\hat{\Delta}_m}{\lambda(T - t_{m+1})}\right)^2\right] \\ &\quad + 2 \sum_{m=0}^{n-2} \sum_{m'=m+1}^{n-1} \mathbb{E}\left[\frac{\hat{\Delta}_m}{\lambda(T - t_{m+1})} \frac{\hat{\Delta}_{m'}}{\lambda(T - t_{m'+1})}\right] + 2\eta_n \sum_{m=0}^{n-1} \mathbb{E}\left[\frac{\hat{\Delta}_m}{\lambda(T - t_{m+1})}\right] \\ &= \eta_n^2 + \sum_{m=0}^{n-1} \mathbb{E}\left[\left(\frac{\hat{\Delta}_m}{\lambda(T - t_{m+1})}\right)^2\right] \\ &= \eta_n^2 + \sum_{m=0}^{n-1} \mathbb{E}\left[\frac{(t_{m+1} - t_m) \hat{\rho}_m}{\lambda(T - t_{m+1})^2}\right] \\ &\leq \eta_n^2 + \sum_{m=0}^{n-1} \frac{t_{m+1} - t_m}{\lambda(T - t_{m+1})^2}, \end{aligned}$$

where the second equality follows since  $\mathbb{E}[\hat{\Delta}_m] = 0$  together with the property that for any  $m, m'$  with  $m < m'$ ,

$$\mathbb{E}[\hat{\Delta}_m \hat{\Delta}_{m'}] = \mathbb{E}\left[\hat{\Delta}_m \mathbb{E}\left[\hat{\Delta}_{m'} \middle| \mathcal{F}_{t_{m+1}-}\right]\right] = \mathbb{E}[\hat{\Delta}_m \cdot 0] = 0.$$

Next, we bound  $B_2$ . We discuss the following two cases:  $\hat{\rho}_n \leq \rho^d$  and  $\hat{\rho}_n > \rho^d$ .

Case 1:  $\hat{\rho}_n \leq \rho^d$ .

We have

$$(\hat{\rho}_n - \rho^d)^2 - \left( \eta_n + \sum_{m=0}^{n-1} \frac{\hat{\Delta}_m}{\lambda(T - t_{m+1})} \right)^2 \leq (\hat{\rho}_n - \rho^d)^2 \leq (\rho^d)^2.$$

Case 2:  $\hat{\rho}_n > \rho^d$ .

We have:

$$\begin{aligned} \hat{\rho}_n &= \max_{s \in \{0, \dots, n\}} \left\{ \left( \rho^d - \eta_s - \sum_{m=0}^{s-1} \frac{\hat{\Delta}_m}{\lambda(T - t_{m+1})} \right)^+ \right\} \\ &\leq \max_{s \in \{0, \dots, n\}} \left\{ \rho^d - \eta_s - \sum_{m=0}^{s-1} \frac{\hat{\Delta}_m}{\lambda(T - t_{m+1})} \right\}, \end{aligned}$$

where the first equality follows from the definition of  $\hat{\rho}_n$  and the second equality holds due to the following reasons: If  $y = \max \{x_1^+, x_2^+, \dots, x_K^+\}$ , where  $(\cdot)^+$  is a projection to  $[0, 1]$ , and  $y > 0$ , then there must exist at least one  $k \in \{1, \dots, K\}$  such that  $x_k > 0$ . Moreover,  $y \leq \max \{x_1, x_2, \dots, x_K\}$ .

We can further bound:

$$\begin{aligned} \hat{\rho}_n - \rho^d &\leq \max_{s \in \{0, \dots, n\}} \left\{ -\eta_s - \sum_{m=0}^{s-1} \frac{\hat{\Delta}_m}{\lambda(T - t_{m+1})} \right\} \\ &\leq \max_{s \in \{0, \dots, n\}} \left\{ -\eta_s + \sum_{m=0}^{s-1} \frac{(t_{m+1} - t_m) \hat{\rho}_m}{T - t_{m+1}} \right\} \\ &\leq \max_{s \in \{0, \dots, n\}} \left\{ -\eta_s + \sum_{m=0}^{s-1} \frac{t_{m+1} - t_m}{T - t_{m+1}} \right\} \\ &\leq -\eta_N + \sum_{m=0}^{N-1} \frac{t_{m+1} - t_m}{T - t_{m+1}} \\ &= \frac{(\ln(x_0 + 1))^\alpha}{(\lambda T)^{1/2}} \sum_{m=0}^{N-1} \frac{T^{1/2} (t_{m+1} - t_m)^{1/2}}{T - t_{m+1}} + \sum_{m=0}^{N-1} \frac{t_{m+1} - t_m}{T - t_{m+1}} \\ &\leq \frac{(\ln(x_0 + 1))^\alpha}{(\lambda T)^{1/2}} \sum_{m=0}^{N-1} \frac{1}{\theta^{m/2+1}} + \sum_{m=0}^{N-1} \frac{1}{\theta} \\ &\leq N \frac{(\ln(x_0 + 1))^\alpha}{(\lambda T)^{1/2}} \theta^{-\frac{N+1}{2}} + N \theta^{-1} \\ &\leq N (\ln(x_0 + 1))^\alpha \frac{(x_0 + 1)^{1/2}}{(\lambda T)^{1/2}} + N (x_0 + 1)^{\frac{1}{N+2}}. \end{aligned}$$

Put the results for the two cases together, we get:

$$\begin{aligned} & (\hat{\rho}_n - \rho^d)^2 - \left( \eta_n + \sum_{m=0}^{n-1} \frac{\hat{\Delta}_m}{\lambda(T - t_{m+1})} \right)^2 \\ & \leq \left( \max \left\{ \rho^d, N (\ln(x_0 + 1))^\alpha \frac{(x_0 + 1)^{1/2}}{(\lambda T)^{1/2}} + N (x_0 + 1)^{\frac{1}{N+2}} \right\} \right)^2. \end{aligned}$$

So, we can upper bound  $A_2$  with

$$\begin{aligned} & \lambda \sum_{n=0}^N (t_{n+1} - t_n) \eta_n^2 + \lambda \sum_{n=0}^N \sum_{m=0}^{n-1} (t_{n+1} - t_n) \frac{t_{m+1} - t_m}{\lambda(T - t_{m+1})^2} \\ & + \lambda T \left( \max \left\{ \rho^d, N (\ln(x_0 + 1))^\alpha \frac{(x_0 + 1)^{1/2}}{(\lambda T)^{1/2}} + N (x_0 + 1)^{\frac{1}{N+2}} \right\} \right)^2 \mathbb{P}(\mathcal{G}^c). \end{aligned} \quad (\text{EC.4})$$

Now, we bound the two terms in (EC.4). For the first term in (EC.4), we have:

$$\begin{aligned} \lambda \sum_{n=0}^N (t_{n+1} - t_n) \eta_n^2 &= (\ln(x_0 + 1))^{2\alpha} \sum_{n=0}^N (t_{n+1} - t_n) \left[ \frac{1}{(t_{n+1} - t_n)^{1/2}} \mathbf{1}\{n < N\} - \sum_{m=0}^{n-1} \frac{(t_{m+1} - t_m)^{1/2}}{T - t_{m+1}} \right]^2 \\ &= (\ln(x_0 + 1))^{2\alpha} \sum_{n=0}^N (\theta^n - \theta^{n+1}) \left[ \frac{1}{(1 - \theta)^{1/2} \theta^{n/2}} \mathbf{1}\{n < N\} - \sum_{m=0}^{n-1} \frac{(1 - \theta)^{1/2}}{\theta^{(m+2)/2}} \right]^2 \\ &= (\ln(x_0 + 1))^{2\alpha} \sum_{n=0}^N \left[ \mathbf{1}\{n < N\} - \frac{(1 - \theta)(1 - \theta^{n/2})}{(1 - \theta^{1/2})\theta^{1/2}} \right]^2 \\ &= (\ln(x_0 + 1))^{2\alpha} \sum_{n=0}^N \left[ \mathbf{1}\{n < N\} + \frac{(1 - \theta)^2 (1 - \theta^{n/2})^2}{(1 - \theta^{1/2})^2 \theta} \right. \\ & \quad \left. - 2 \frac{(1 - \theta)(1 - \theta^{n/2})}{(1 - \theta^{1/2})\theta^{1/2}} \mathbf{1}\{n < N\} \right] \\ &\leq (\ln(x_0 + 1))^{2\alpha} \sum_{n=0}^N \left[ 1 + \frac{(1 + \theta^{1/2})^2}{\theta} \right] \\ &\leq 5 (\ln(x_0 + 1))^{2\alpha} \frac{N + 1}{\theta}, \end{aligned}$$

where the first inequality follows since  $1 - \theta = (1 - \theta^{1/2})(1 + \theta^{1/2})$  and  $(1 - \theta^{n/2})^2 \leq 1$  and the last inequality follows since  $1 + \theta^{1/2} \leq 2$  and  $1 \leq 1/\theta$ .

For the second term in (EC.4), we have:

$$\begin{aligned} \sum_{n=0}^N \sum_{m=0}^{n-1} (t_{n+1} - t_n) \frac{t_{m+1} - t_m}{(T - t_{m+1})^2} &= \sum_{m=0}^{N-1} \frac{t_{m+1} - t_m}{(T - t_{m+1})^2} \left[ \sum_{n=m+1}^N (t_{n+1} - t_n) \right] \\ &= \sum_{m=0}^{N-1} \frac{t_{m+1} - t_m}{T - t_{m+1}} \end{aligned}$$

$$\begin{aligned}
&= \sum_{m=0}^{N-1} \frac{1-\theta}{\theta} \\
&\leq \frac{N}{\theta}.
\end{aligned}$$

Combining the bounds for all the first two terms in (EC.4), we can bound  $A_2$  with

$$\begin{aligned}
&5 (\ln(x_0 + 1))^{2\alpha} \frac{N+1}{\theta} + \frac{N}{\theta} \\
&+ \lambda T \left( \max \left\{ \rho^d, N (\ln(x_0 + 1))^\alpha \frac{(x_0 + 1)^{1/2}}{(\lambda T)^{1/2}} + N (x_0 + 1)^{\frac{1}{N+2}} \right\} \right)^2 \mathbb{P}(\mathcal{G}^c).
\end{aligned}$$

This completes the proof of Lemma EC.1.  $\blacksquare$

### Proof of Lemma EC.2.

Conditional on  $\mathcal{G}$ , we have:

$$\rho_n = \rho^d - \eta_n - \sum_{m=0}^{n-1} \frac{\hat{\Delta}_m}{\lambda(T - t_{m+1})}, \quad \forall n = 0, \dots, N \quad \text{and} \quad \hat{\rho}_N \in (0, 1).$$

Therefore, we can bound

$$\begin{aligned}
x_0 - \sum_{n=0}^{N-1} \hat{S}_n &= \lambda T \rho^d - \sum_{n=0}^{N-1} \left( \lambda (t_{n+1} - t_n) \hat{\rho}_n + \hat{\Delta}_n \right) \\
&= \lambda T \rho^d - \sum_{n=0}^{N-1} \left[ \lambda (t_{n+1} - t_n) \left( \rho^d - \eta_n - \sum_{m=0}^{n-1} \frac{\hat{\Delta}_m}{\lambda(T - t_{m+1})} \right) + \hat{\Delta}_n \right] \\
&= \lambda T \rho^d - \lambda t_N \rho^d + \lambda \sum_{n=0}^{N-1} (t_{n+1} - t_n) \eta_n + \sum_{n=0}^{N-1} \sum_{m=0}^{n-1} (t_{n+1} - t_n) \frac{\hat{\Delta}_m}{T - t_{m+1}} - \sum_{n=0}^{N-1} \hat{\Delta}_n \\
&= \lambda T \rho^d - \lambda t_N \rho^d - \lambda (T - t_N) \eta_N + \sum_{n=0}^{N-1} \sum_{m=0}^{n-1} (t_{n+1} - t_n) \frac{\hat{\Delta}_m}{T - t_{m+1}} - \sum_{n=0}^{N-1} \hat{\Delta}_n \\
&= \lambda T \rho^d - \lambda t_N \rho^d - \lambda (T - t_N) \eta_N + \sum_{m=0}^{N-2} \frac{\hat{\Delta}_m}{T - t_{m+1}} \left[ \sum_{n=m+1}^{N-1} (t_{n+1} - t_n) \right] - \sum_{n=0}^{N-1} \hat{\Delta}_n \\
&= \lambda T \rho^d - \lambda t_N \rho^d - \lambda (T - t_N) \eta_N + \sum_{m=0}^{N-2} \frac{t_N - t_{m+1}}{T - t_{m+1}} \hat{\Delta}_m - \sum_{n=0}^{N-1} \hat{\Delta}_n \\
&= \lambda (T - t_N) \rho^d - \lambda (T - t_N) \eta_N - (T - t_N) \sum_{n=0}^{N-1} \frac{\hat{\Delta}_n}{T - t_{n+1}} \\
&= \lambda (T - t_N) \left( \rho^d - \eta_N - \sum_{n=0}^{N-1} \frac{\hat{\Delta}_n}{\lambda(T - t_{n+1})} \right) \\
&= \lambda (T - t_N) \hat{\rho}_N
\end{aligned}$$

$$= \lambda T (x_0 + 1)^{\frac{-N}{N+2}} \hat{\rho}_N > 0. \blacksquare$$

**Proof of Lemma EC.3.**

We have:

$$\mathbb{E} \left[ \left( \sum_{n=0}^N \hat{S}_n - x_0 \right)^+ \right] = \underbrace{\mathbb{E} \left[ \left( \sum_{n=0}^N \hat{S}_n - x_0 \right)^+ \mathbf{1}\{\mathcal{G}\} \right]}_{C_1} + \underbrace{\mathbb{E} \left[ \left( \sum_{n=0}^N \hat{S}_n - x_0 \right)^+ \mathbf{1}\{\mathcal{G}^c\} \right]}_{C_2}.$$

First, we establish an upper bound of  $C_1$ . Note that

$$\begin{aligned} C_1 &= \mathbb{E} \left[ \left( \sum_{n=0}^N \hat{S}_n - x_0 \right)^+ \middle| \mathcal{G} \right] \mathbb{P}(\mathcal{G}) \\ &= \mathbb{E} \left[ \left( \hat{S}_N - X_{t_N^-} \right)^+ \middle| \mathcal{G} \right] \mathbb{P}(\mathcal{G}) \\ &= \mathbb{E} \left[ \left( \hat{S}_N - \lambda(T - t_N) \hat{\rho}_N \right)^+ \middle| \mathcal{G} \right] \mathbb{P}(\mathcal{G}) \\ &= \mathbb{E} \left[ \left( \hat{S}_N - \lambda(T - t_N) \hat{\rho}_N \right)^+ \right] \\ &\leq \frac{1}{2} \lambda^{\frac{1}{2}} (T - t_N)^{\frac{1}{2}} \\ &= \frac{1}{2} (\lambda T)^{\frac{1}{2}} (x_0 + 1)^{-\frac{N}{2(N+2)}}, \end{aligned}$$

where the second equality follow from Lemma EC.2 and the inequality follows since  $\hat{\rho}_N \in [0, 1]$  combined with the fact that if a random variable  $X$  has mean  $\mu$  and standard deviation  $\sigma$ , then  $\mathbb{E}[(X - \mu)^+] \leq \frac{\sigma}{2}$  (see equation (18) in Gallego and Van Ryzin (1994)).

Next, we establish an upper bound of  $C_2$ . We denote by  $\tilde{Z}$  the total number of customers arriving to the system over  $[0, T]$ . Then,  $\tilde{Z}$  is a Poisson random variable with parameter  $\lambda T$ . We have:

$$\begin{aligned} C_2 &\leq \mathbb{E} \left[ \left( \tilde{Z} - x_0 \right)^+ \mathbf{1}\{\mathcal{G}^c\} \right] \\ &\leq \mathbb{E} \left[ \tilde{Z} \mathbf{1}\{\mathcal{G}^c\} \right] \\ &\leq \mathbb{E}[\tilde{Z}^2]^{\frac{1}{2}} \mathbb{E}[\mathbf{1}\{\mathcal{G}^c\}]^{\frac{1}{2}} \\ &= (\lambda^2 T^2 + \lambda T)^{\frac{1}{2}} \mathbb{P}(\mathcal{G}^c)^{\frac{1}{2}} \\ &\leq (\lambda T + 1) \mathbb{P}(\mathcal{G}^c)^{\frac{1}{2}}. \end{aligned}$$

The first inequality follows since  $\sum_{n=0}^N \hat{S}_n \leq \tilde{Z}$  and the third inequality follows from Cauchy-Schwarz inequality.

Putting the bounds for  $C_1$  and  $C_2$  together completes the proof of Lemma EC.3. ■

### Proof of Lemma EC.4.

Recall that  $\mathcal{G} \triangleq \bigcap_{n=1}^N (\mathcal{G}_{n0} \cap \mathcal{G}_{n1})$ , where

$$\begin{aligned}\mathcal{G}_{n0} &\triangleq \left\{ \eta_{n-1} - \eta_n > \frac{\hat{\Delta}_{n-1}}{\lambda(T-t_n)} \right\}, \\ \mathcal{G}_{n1} &\triangleq \left\{ \rho^d - \eta_n - \sum_{m=0}^{n-1} \frac{\hat{\Delta}_m}{\lambda(T-t_{m+1})} \in (0, 1) \right\}.\end{aligned}$$

Thus, we can bound the probability of bad event as follows:

$$\mathbb{P}(\mathcal{G}^c) \leq \sum_{n=1}^N \mathbb{P}(\mathcal{G}_{n0}^c) + \sum_{n=1}^N \mathbb{P}(\mathcal{G}_{n1}^c).$$

First, we establish an upper bound of  $\mathbb{P}(\mathcal{G}_{n0}^c)$  for  $n = 1, \dots, N$ . We have

$$\begin{aligned}\mathbb{P}(\mathcal{G}_{n0}^c) &= \mathbb{P}\left(\frac{\hat{\Delta}_{n-1}}{\lambda(T-t_n)} \geq \eta_{n-1} - \eta_n\right) \\ &\leq \exp\left(-0.1\lambda(T-t_n)(\eta_{n-1} - \eta_n) \min\left\{\frac{\lambda(T-t_n)(\eta_{n-1} - \eta_n)}{\lambda(t_n - t_{n-1})}, 1\right\}\right) \\ &= \exp\left(-0.1\lambda(T-t_n)(\eta_{n-1} - \eta_n) \min\left\{\frac{T-t_n}{t_n - t_{n-1}}(\eta_{n-1} - \eta_n), 1\right\}\right) \\ &= \exp\left(-0.1\lambda T \theta^n (\eta_{n-1} - \eta_n) \min\left\{\frac{\theta}{1-\theta}(\eta_{n-1} - \eta_n), 1\right\}\right) \\ &\leq \exp\left(-0.1(\lambda T)^{\frac{1}{2}} (\ln(x_0 + 1))^\alpha \frac{(1-\theta^{1/2})\theta^{(n-1)/2}}{(1-\theta)^{1/2}} \min\left\{\frac{(\ln(x_0 + 1))^\alpha}{(\lambda T)^{1/2}} \frac{1-\theta^{1/2}}{\theta^{(n-1)/2}(1-\theta)^{3/2}}, 1\right\}\right) \\ &= \exp\left(-0.1(\ln(x_0 + 1))^{2\alpha} \min\left\{\frac{(1-\theta^{1/2})^2}{(1-\theta)^2}, \frac{(\lambda T)^{1/2}}{(\ln(x_0 + 1))^\alpha} \frac{(1-\theta^{1/2})\theta^{(n-1)/2}}{(1-\theta)^{1/2}}\right\}\right) \\ &\leq \exp\left(-0.1(\ln(x_0 + 1))^{2\alpha} \min\left\{(1-\theta^{1/2})^2, \frac{(\lambda T)^{1/2}}{(\ln(x_0 + 1))^\alpha} (1-\theta^{1/2})\theta^{(N-1)/2}\right\}\right),\end{aligned}$$

where the first inequality follows from Lemma EC.5; the second inequality follows since

$$\begin{aligned}\eta_{n-1} - \eta_n &= \frac{(\ln(x_0 + 1))^\alpha}{(\lambda T)^{1/2}} \cdot \left[ \frac{T^{1/2}}{(t_n - t_{n-1})^{1/2}} - \frac{T^{1/2}}{(t_{n+1} - t_n)} \mathbf{1}\{n < N\} + \frac{T^{1/2}(t_n - t_{n-1})^{1/2}}{T - t_n} \right] \\ &\geq \frac{(\ln(x_0 + 1))^\alpha}{(\lambda T)^{1/2}} \cdot \left[ \frac{T^{1/2}}{(t_n - t_{n-1})^{1/2}} - \frac{T^{1/2}}{(t_{n+1} - t_n)} + \frac{T^{1/2}(t_n - t_{n-1})^{1/2}}{T - t_n} \right] \\ &= \frac{(\ln(x_0 + 1))^\alpha}{\lambda^{1/2}} \frac{1 - \theta^{1/2}}{T^{1/2} \theta^{(n+1)/2} (1 - \theta)^{1/2}},\end{aligned}$$

for all  $n = 1, \dots, N$ ; and, the last inequality follows since  $\theta \in [0, 1]$  and  $n \leq N$ .

Second, we establish an upper bound of  $\mathbb{P}(\mathcal{G}_{n1}^c)$ . We can write  $\mathcal{G}_{n1}^c = E_{n1} \cup E_{n2}$  where

$$E_{n1} \triangleq \left\{ \rho^d - \eta_n - \sum_{m=0}^{n-1} \frac{\hat{\Delta}_m}{\lambda(T - t_{m+1})} \leq 0 \right\},$$

$$E_{n2} \triangleq \left\{ \rho^d - \eta_n - \sum_{m=0}^{n-1} \frac{\hat{\Delta}_m}{\lambda(T - t_{m+1})} \geq 1 \right\}.$$

The two events  $E_1$  and  $E_2$  are independent. So,  $\mathbb{P}(\mathcal{G}_1^c) = \mathbb{P}(E_1) + \mathbb{P}(E_2)$ . We start with deriving an upper bound for  $\mathbb{P}(E_1)$ .

Consider  $\mu \in (0, \lambda)$  and suppose that  $\eta_n < \rho^d$  and  $\theta < \frac{2}{\rho^d - \eta_n}$ <sup>6</sup>. We have:

$$\begin{aligned} \mathbb{P}(E_{n1}) &= \mathbb{P} \left( \sum_{m=0}^{n-1} \frac{\hat{\Delta}_m}{\lambda(T - t_{m+1})} \geq \rho^d - \eta_n \right) \\ &= \mathbb{P} \left( \sum_{m=0}^{n-1} \frac{(T - t_n) \hat{\Delta}_m}{\lambda(T - t_{m+1})} \geq (T - t_n)(\rho^d - \eta_n) \right) \\ &= \mathbb{P} \left( \exp \left( \frac{\mu}{\lambda} \sum_{m=0}^{n-1} \frac{T - t_n}{T - t_{m+1}} \hat{\Delta}_m \right) \geq \exp(\mu(T - t_n)(\rho^d - \eta_n)) \right) \\ &\leq \mathbb{E} \left[ \exp \left( \frac{\mu}{\lambda} \sum_{m=0}^{n-1} \frac{T - t_n}{T - t_{m+1}} \hat{\Delta}_m - \mu(T - t_n)(\rho^d - \eta_n) \right) \right] \\ &\leq \exp \left( \frac{\mu^2}{\lambda} \sum_{m=0}^{n-1} \frac{(T - t_n)^2}{(T - t_{m+1})^2} (t_{m+1} - t_m) - \mu(T - t_n)(\rho^d - \eta_n) \right) \\ &= \exp \left( \frac{\mu^2 T \theta^{2n}}{\lambda} \sum_{m=0}^{n-1} \frac{1 - \theta}{\theta^{m+2}} - \mu T \theta^n (\rho^d - \eta_n) \right) \\ &= \exp \left( \frac{\mu^2 T \theta^{2n}}{\lambda} \frac{1}{\theta} \left( \frac{1}{\theta^n} - 1 \right) - \mu T \theta^n (\rho^d - \eta_n) \right) \\ &\leq \exp \left( \mu^2 \frac{T \theta^{n-1}}{\lambda} - \mu T \theta^n (\rho^d - \eta_n) \right), \end{aligned}$$

where the first inequality follows from Markov inequality, and the second inequality follows by repeated application of moment generating function of Poisson random variable together with the fact that  $e^{\tilde{\mu}} \leq 1 + \tilde{\mu} + \tilde{\mu}^2$  for  $\tilde{\mu} \in [0, 1]$ , similar to the argument in the proof of Theorem 3.

The last bound for  $\mathbb{P}(E_{n1})$  is minimized at

$$\mu = \frac{\theta \lambda (\rho^d - \eta_n)}{2},$$

<sup>6</sup> This condition is satisfied in the asymptotic regime that we will analyze in the later part of this proof. As we will show momentarily,  $\lim_{k \rightarrow \infty} \theta^{(k)} = 0$  and  $\lim_{k \rightarrow \infty} \eta_n^{(k)} = 0$  for all  $n = 1, \dots, N$  where  $N$  satisfies the condition stated in Theorem 4. Therefore, this condition is guaranteed to hold for sufficiently large  $k$ .

which is in  $(0, \lambda)$  since  $\theta < \frac{2}{\rho^d - \eta_n}$ , and yields the following bound:

$$\mathbb{P}(E_{n1}) \leq \exp\left(-\frac{\lambda T \theta^{n+1} (\rho^d - \eta_n)^2}{4}\right) \leq \exp\left(-\frac{\lambda T \theta^{N+1} (\rho^d - \eta_1)^2}{4}\right).$$

The last inequality holds since  $\theta \in [0, 1]$  and  $0 < \rho^d - \eta_0 \leq \rho^d - \eta_1 \leq \rho^d - \eta_2 \leq \dots \leq \rho^d - \eta_N$ .

We can derive a bound for  $\mathbb{P}(E_{n2})$  using a similar argument as above (i.e., as in the proof of Theorem 3). Specifically, assuming  $\eta_n < \rho^d$  and  $\theta < \frac{2}{1 - \rho^d + \eta_n}$ , for  $\mu \in (0, \lambda)$ , we have:

$$\begin{aligned} \mathbb{P}(E_{n2}) &= \mathbb{P}\left(\sum_{m=0}^{n-1} \frac{-\hat{\Delta}_m}{\lambda(T - t_{m+1})} \geq 1 - (\rho^d - \eta_n)\right) \\ &\leq \exp\left(\mu^2 \frac{T \theta^{n-1}}{\lambda} - \mu T \theta^n (1 - \rho^d + \eta_n)\right). \end{aligned}$$

The last bound is minimized at

$$\mu = \frac{\theta \lambda (1 - \rho^d + \eta_n)}{2},$$

which is in  $(0, \lambda)$  since  $\theta < \frac{2}{1 - \rho^d + \eta_n}$ , and yields the following bound:

$$\mathbb{P}(E_{n2}) \leq \exp\left(-\frac{\lambda T \theta^{n+1} (1 - \rho^d + \eta_n)^2}{4}\right) \leq \exp\left(-\frac{\lambda T \theta^{N+1} (1 - \rho^d + \eta_N)^2}{4}\right).$$

We conclude that as long as  $\theta < \min\left\{\frac{2}{\rho^d - \eta_n}, \frac{2}{1 - \rho^d + \eta_n}\right\}$  for all  $n = 1, \dots, N$ , we have:

$$\begin{aligned} \mathbb{P}(\mathcal{G}^c) &\leq \sum_{n=1}^N \mathbb{P}(\mathcal{G}_{n0}^c) + \sum_{n=1}^N \mathbb{P}(\mathcal{G}_{n1}^c) \\ &\leq N \exp\left(-0.1 (\ln(x_0 + 1))^{2\alpha} \min\left\{(1 - \theta^{1/2})^2, \frac{(\lambda T)^{1/2}}{(\ln(x_0 + 1))^\alpha} (1 - \theta^{1/2}) \theta^{(N-1)/2}\right\}\right) \\ &\quad + N \exp\left(-\frac{\lambda T \theta^{N+1} (\rho^d - \eta_1)^2}{4}\right) + N \exp\left(-\frac{\lambda T \theta^{N+1} (1 - \rho^d + \eta_N)^2}{4}\right). \end{aligned}$$

Now, observe that

$$\lim_{k \rightarrow \infty} \theta^{(k)} = 0, \quad \lim_{k \rightarrow \infty} \frac{(\lambda T^{(k)})^{1/2} (\theta^{(k)})^{(N+1)/2}}{(\ln(x_0^{(k)} + 1))^\alpha} = \infty, \quad \lim_{k \rightarrow \infty} \eta_n^{(k)} = 0$$

for all  $n = 1, \dots, N$  where  $N$  satisfies the condition in Theorem 4. The first one is obvious. The second one follows since the numerator is on the order of

$$k^{\frac{1}{2} \frac{1}{N+2}} \geq (\ln(k))^{2\alpha}$$

(by the condition on  $N$  in Theorem 4). As for the last limit, it is the consequence of the first two limits. To see this, note that

$$\begin{aligned}
\eta_n &= \frac{(\ln(x_0 + 1))^\alpha}{(\lambda T)^{1/2}} \cdot \left[ \frac{T^{1/2}}{(t_{n+1} - t_n)^{1/2}} \mathbf{1}\{n < N\} - \sum_{m=0}^{n-1} \frac{T^{1/2} (t_{m+1} - t_m)^{1/2}}{T - t_{m+1}} \right] \\
&= \frac{(\ln(x_0 + 1))^\alpha}{(\lambda T)^{1/2}} \cdot \left[ \frac{1}{\theta^{n/2} (1 - \theta)^{1/2}} \mathbf{1}\{n < N\} - \sum_{m=0}^{n-1} \frac{(1 - \theta)^{1/2}}{\theta^{(m+2)/2}} \right] \\
&= \frac{(\ln(x_0 + 1))^\alpha}{(\lambda T)^{1/2}} \cdot \left[ \frac{1}{\theta^{n/2} (1 - \theta)^{1/2}} \mathbf{1}\{n < N\} - \frac{(1 - \theta)^{1/2}}{\theta} \left( \frac{1}{\theta^{n/2}} - 1 \right) \left( \frac{1}{\theta^{1/2}} - 1 \right)^{-1} \right] \\
&= \frac{(\ln(x_0 + 1))^\alpha}{(\lambda T)^{1/2}} \cdot \left[ \frac{1}{\theta^{n/2} (1 - \theta)^{1/2}} \mathbf{1}\{n < N\} - \frac{(1 - \theta)^{1/2}}{1 - \theta^{1/2}} \frac{1 - \theta^{n/2}}{\theta^{(n+1)/2}} \right].
\end{aligned}$$

It is not difficult to see that the first two limits above imply  $\lim_{k \rightarrow \infty} \eta_n^{(k)} = 0$ .

Let  $\hat{\beta} \triangleq \min\{\rho^d, 1 - \rho^d\}/2$ . (Note that  $\hat{\beta} \in (0, 1)$ .) Based on our limit results above, we conclude there exists a constant  $K > 0$  such that, for all  $k > K$ , we have:

$$\begin{aligned}
\frac{(\lambda T^{(k)})^{1/2}}{(\ln(x_0^{(k)} + 1))^\alpha} (1 - (\theta^{(k)})^{1/2}) (\theta^{(k)})^{(N-1)/2} &\geq (1 - (\theta^{(k)})^{1/2})^2, \\
(1 - (\theta^{(k)})^{1/2})^2 &\geq 1/2, \\
\lambda T^{(k)} (\theta^{(k)})^{N+1} &\geq \frac{0.2}{\hat{\beta}^2} \cdot (\ln(x_0^{(k)} + 1))^{2\alpha}, \\
\rho^d - \eta_1^{(k)} &\geq \hat{\beta}, \\
1 - \rho^d + \eta_N^{(k)} &\geq \hat{\beta},
\end{aligned}$$

which yields the final bound for the probability of bad event

$$\mathbb{P}(\mathcal{G}^c) \leq 3N \exp\left(-0.05 \left(\ln(x_0^{(k)} + 1)\right)^{2\alpha}\right).$$

## C: Useful Auxiliary Results

LEMMA EC.5. *Let  $\Lambda \in (0, \lambda]$  be a random variable. Let  $X$  be a random variable such that, conditional on  $\Lambda$ ,  $X$  follows a Poisson distribution with parameter  $\Lambda$ . Then, for any  $\epsilon > 0$ ,*

$$\mathbb{P}(X - \Lambda \geq \epsilon) \leq \exp\left(-0.1\epsilon \min\left\{\frac{\epsilon}{\lambda}, 1\right\}\right).$$

### Proof of Lemma EC.5.

For any  $s > 0$ , we have

$$\mathbb{P}(X - \Lambda \geq \epsilon) = \mathbb{P}(\exp(s(X - \Lambda)) \geq \exp(s\epsilon))$$

$$\begin{aligned}
&\leq \mathbb{E}[\exp(s(X - \Lambda))] \exp(-s\epsilon) \\
&= \mathbb{E}[\mathbb{E}[\exp(s(X - \Lambda)) | \Lambda]] \exp(-s\epsilon) \\
&= \mathbb{E}[\exp(\Lambda(e^s - 1 - s))] \exp(-s\epsilon) \\
&\leq \exp(\lambda(e^s - 1 - s)) \exp(-s\epsilon) \\
&= \exp(\lambda(e^s - 1 - s) - s\epsilon),
\end{aligned}$$

where the first inequality follows from Markov's inequality, the second equality follows from the law of total expectation, the second inequality follows from the property that for  $x \geq 0$ ,  $e^x - 1 - x \geq 0$  and the condition that  $\Lambda \leq \lambda$ .

We take  $s = \min\{\frac{\epsilon}{\lambda}, 1\}$ . Consider first the scenario where  $\epsilon \leq \lambda$ . We have

$$\begin{aligned}
\lambda(e^s - 1 - s) - s\epsilon &= \lambda\left(e^{\epsilon/\lambda} - 1 - \frac{\epsilon}{\lambda}\right) - \frac{\epsilon^2}{\lambda} \\
&\leq 0.9\frac{\epsilon^2}{\lambda} - \frac{\epsilon^2}{\lambda} \\
&= -0.1\frac{\epsilon^2}{\lambda},
\end{aligned}$$

where the inequality follows since  $e^x - 1 - x \leq 0.9x^2$  for  $x \in [-1, 1]$ .

Consider now the scenario where  $\epsilon > \lambda$ . We have

$$\begin{aligned}
\lambda(e^s - 1 - s) - s\epsilon &= \lambda(e - 2) - \epsilon \\
&\leq 0.9\lambda - \epsilon \\
&\leq 0.9\epsilon - \epsilon \\
&= -0.1\epsilon.
\end{aligned}$$

The two scenarios above jointly imply

$$\mathbb{P}(X - \Lambda \geq \epsilon) \leq \exp\left(-0.1\epsilon \min\left\{\frac{\epsilon}{\lambda}, 1\right\}\right).$$

■

## D: Additional Simulations

We consider both logit demand model  $\bar{F}(p) = 2/(1 + e^{ap})$  and exponential demand model  $\bar{F}(p) = e^{-ap}$ . We use  $\lambda = 1$  and  $T = 1$ . We test the performance of four policies (similar to those in Tables 1-3) under different parameter values. The results can be seen in Table EC.1 and EC.2.

| $a$ | $x_0/(\lambda T)$ | $k$  | FP    | MD $N = 1$ | MD $N = 2$ | MD $N = 3$ |
|-----|-------------------|------|-------|------------|------------|------------|
| 0.5 | 0.1               | 200  | 14.26 | 9.90       | 9.06       | 8.58       |
|     |                   | 300  | 11.10 | 7.89       | 6.79       | 6.60       |
|     |                   | 400  | 9.98  | 6.69       | 5.99       | 5.59       |
|     |                   | 500  | 8.45  | 5.86       | 5.19       | 4.88       |
|     |                   | 1000 | 6.21  | 3.80       | 3.41       | 3.07       |
| 0.5 | 0.3               | 200  | 7.83  | 6.09       | 5.97       | 5.92       |
|     |                   | 300  | 6.46  | 4.73       | 4.60       | 4.66       |
|     |                   | 400  | 5.61  | 4.20       | 3.97       | 3.90       |
|     |                   | 500  | 5.07  | 3.58       | 3.52       | 3.48       |
|     |                   | 1000 | 3.38  | 2.40       | 2.34       | 2.27       |
| 1   | 0.1               | 200  | 13.89 | 9.95       | 9.25       | 8.57       |
|     |                   | 300  | 10.80 | 8.04       | 7.13       | 6.59       |
|     |                   | 400  | 9.63  | 6.63       | 6.03       | 5.73       |
|     |                   | 500  | 8.55  | 5.84       | 5.06       | 4.83       |
|     |                   | 1000 | 6.41  | 3.94       | 3.28       | 3.23       |
| 1   | 0.3               | 200  | 7.88  | 6.15       | 5.95       | 5.77       |
|     |                   | 300  | 6.15  | 4.91       | 4.73       | 4.73       |
|     |                   | 400  | 5.39  | 4.19       | 4.12       | 4.03       |
|     |                   | 500  | 4.98  | 3.60       | 3.48       | 3.42       |
|     |                   | 1000 | 3.48  | 2.41       | 2.32       | 2.22       |

**Table EC.1** Percentage losses of different policies under logit demand.

| $a$ | $x_0/(\lambda T)$ | $k$  | FP    | MD $N = 1$ | MD $N = 2$ | MD $N = 3$ |
|-----|-------------------|------|-------|------------|------------|------------|
| 0.5 | 0.1               | 200  | 14.07 | 11.64      | 10.57      | 10.07      |
|     |                   | 300  | 12.01 | 9.00       | 8.43       | 7.96       |
|     |                   | 400  | 10.66 | 7.52       | 6.89       | 6.60       |
|     |                   | 500  | 9.00  | 6.90       | 6.11       | 5.98       |
|     |                   | 1000 | 6.49  | 4.58       | 3.96       | 3.69       |
| 0.5 | 0.3               | 200  | 8.51  | 7.23       | 6.92       | 6.72       |
|     |                   | 300  | 7.05  | 5.55       | 5.53       | 5.45       |
|     |                   | 400  | 6.21  | 4.84       | 4.65       | 4.54       |
|     |                   | 500  | 5.26  | 4.31       | 4.08       | 3.91       |
|     |                   | 1000 | 3.82  | 2.83       | 2.73       | 2.63       |
| 1   | 0.1               | 200  | 14.45 | 11.61      | 10.59      | 10.27      |
|     |                   | 300  | 11.99 | 8.93       | 8.32       | 7.75       |
|     |                   | 400  | 10.60 | 8.02       | 6.81       | 6.77       |
|     |                   | 500  | 9.16  | 6.84       | 6.04       | 5.80       |
|     |                   | 1000 | 6.72  | 4.48       | 3.81       | 3.52       |
| 1   | 0.3               | 200  | 8.51  | 7.25       | 6.95       | 6.73       |
|     |                   | 300  | 7.26  | 5.72       | 5.64       | 5.56       |
|     |                   | 400  | 6.13  | 4.84       | 4.76       | 4.74       |
|     |                   | 500  | 5.30  | 4.20       | 4.14       | 4.04       |
|     |                   | 1000 | 3.79  | 2.94       | 2.74       | 2.68       |

**Table EC.2** Percentage losses of different policies under exponential demand.
